# Supplementary material
Source: Springer Nature journal article supplement (https://www.springermedizin.de/resource/supplementary/13063_2011_701_MOESM1_ESM.pdf/9618546)

Screened for  
eligibility (N=)

Excluded  
Not meeting inclusion criteria (N=)  
Refused to participate (N=)

Baseline Assessment

Excluded  
Not meeting inclusion criteria  
(N=)

Randomised  
(N=540)

Allocated to SCC  
(N=180)

Allocated to CBT  
(N=180)

Allocated to STPP  
(N=180)

Lost to follow-up  
(N=)

Lost to follow-up  
(N=)

Lost to follow-up  
(N=)

Analysed  
(N=)

Analysed  
(N=)

Analysed  
(N=)

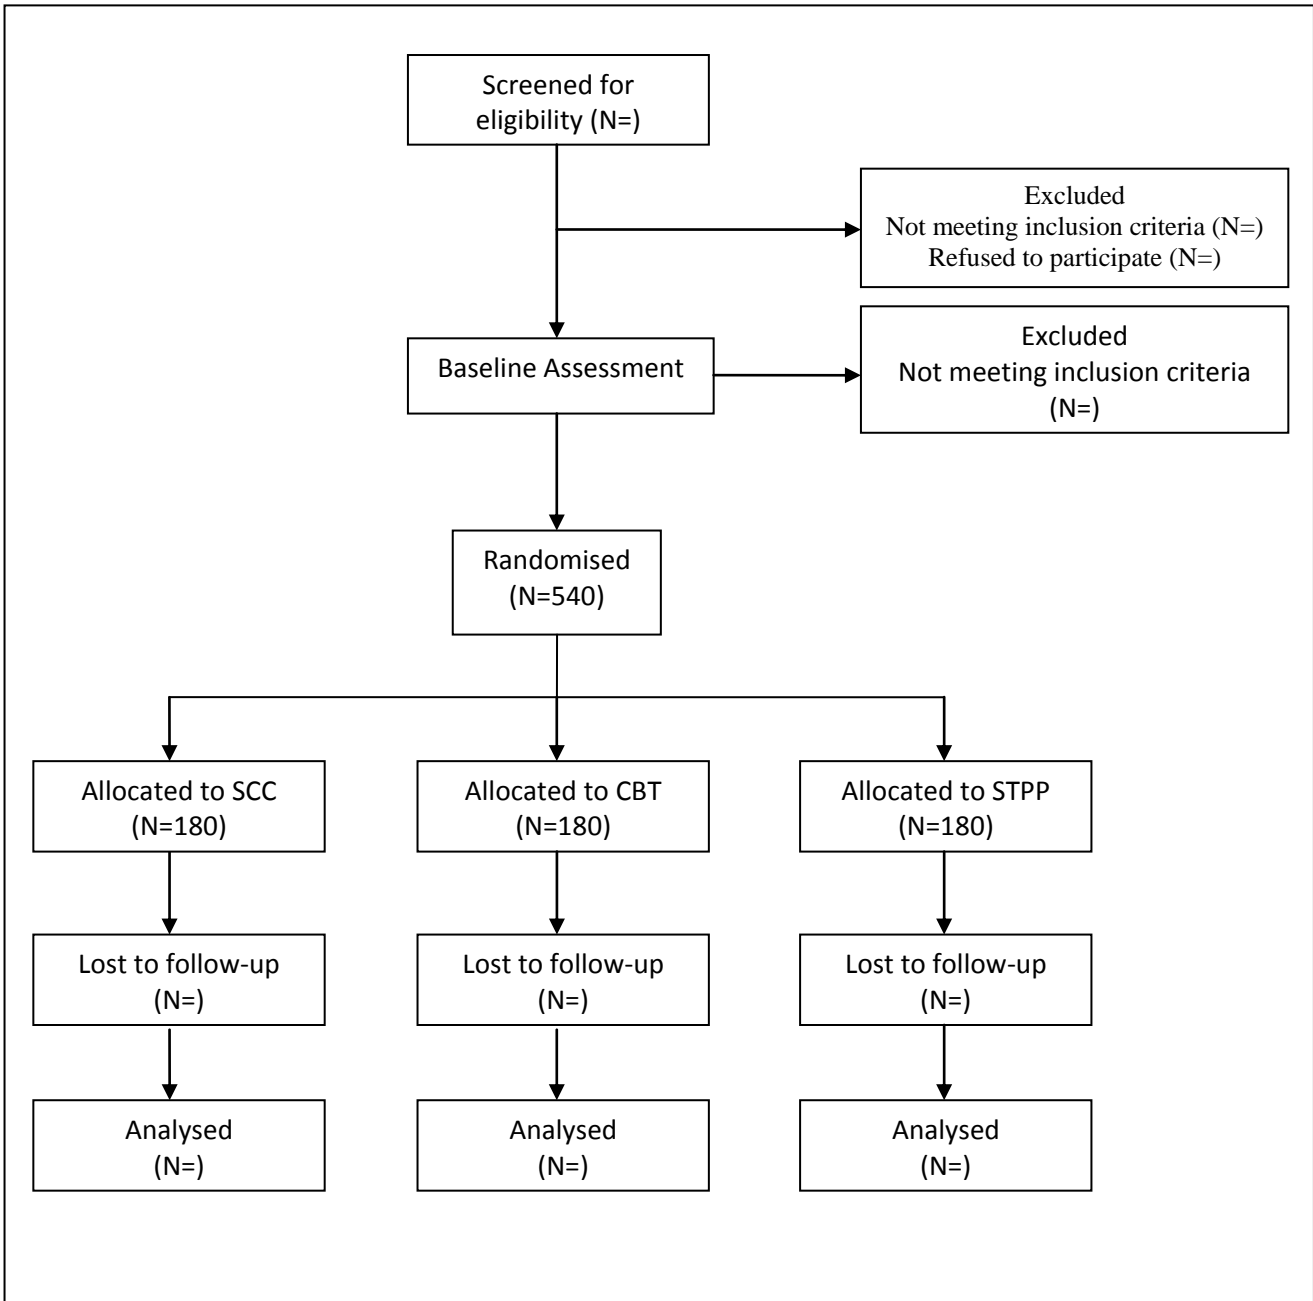

Supplement: MOESM1 [file 9618546]
